# Supplementary material for: Tunable polaron-induced coloration of tungsten oxide via a multi-step control of the physicochemical property for the detection of gaseous F
Source: Royal Society of Chemistry journal article supplement (doi:10.1039/c8cp00158h), 2018-01-01
Supplement: c8cp00158h1.pdf [file c8cp00158h1.pdf]

## Supporting Information

### Tunable Polaron-induced Coloration of Tungsten Oxide *via* a Multi-step Control of Physicochemical Property for Gaseous F Detection

Sang Yeon Lee<sup>a</sup>, Gowoon Shim<sup>a</sup>, Jucheol Park<sup>b</sup>, and Hyungtak Seo<sup>a,c\*</sup>

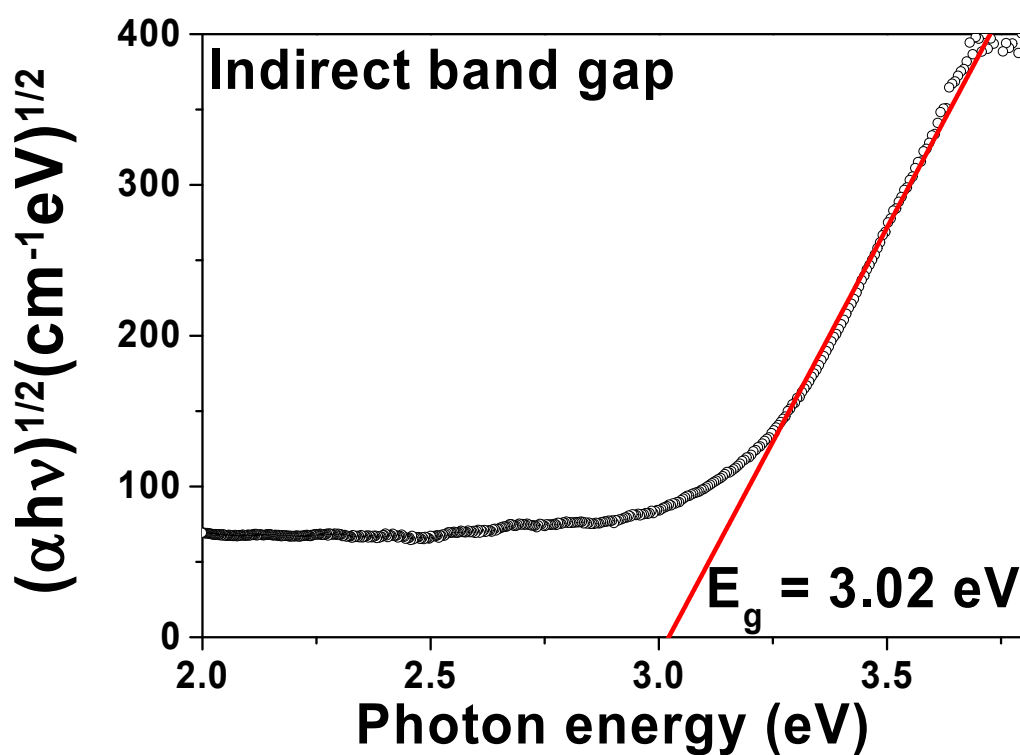

Figure S1. The extracted optical band gap of tungsten oxide from Tauc plot

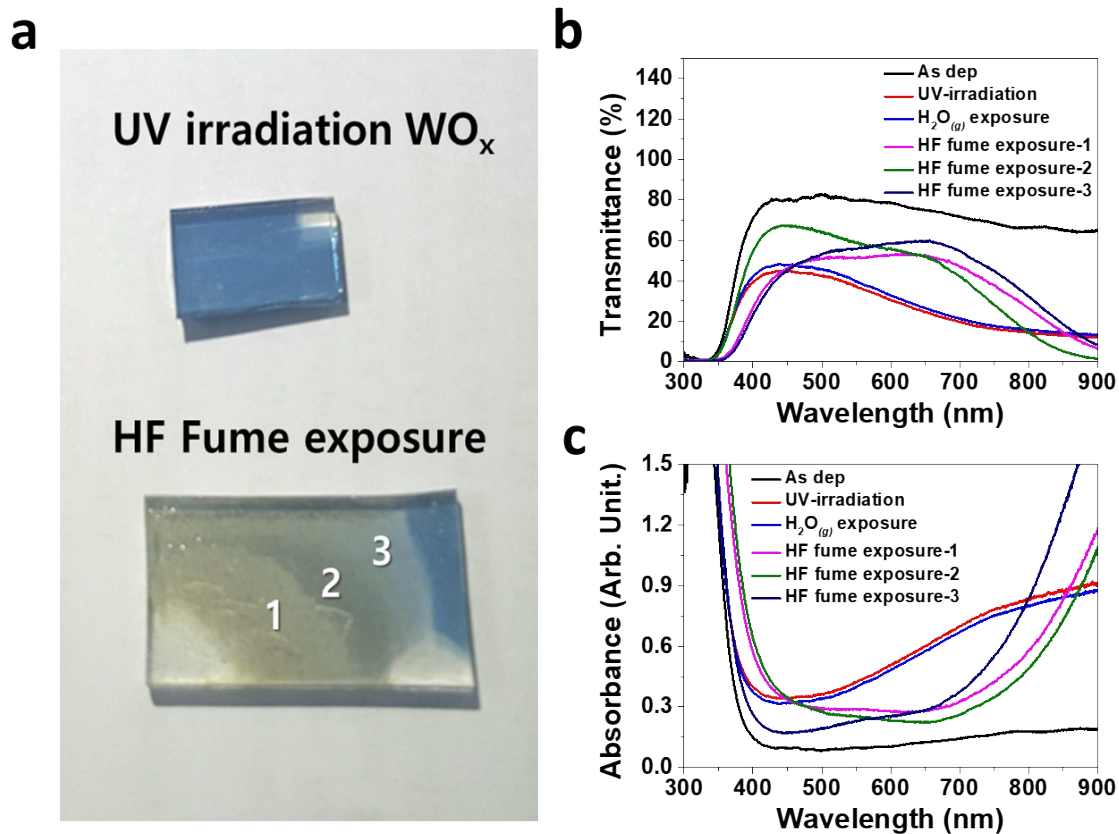

Figure S2. a) Photoimages, b) transmittance, and c) absorbance spectra of of pristine, H- $WO_{3-x}$ , and F-  $WO_{3-x}$  films formed on FTO substrate

In Fig. S2, The sample was exposed to HF vapor by heating the 40 % HF solution in air atmosphere and also, was exposed to pure water vapor by boiling DI water to confirm the selectivity against of  $H_2O$ . The experiment was performed by boiling HF solution (40% concentration) in the hood at 50 Celsius degree (Video attached). The bleaching of tungsten oxide by HF exposure was observed within about 10 minutes. In the case of  $H_2O$  exposure, however, any change of colorimetric was not observed while water boiling was proceeded at 100 Celsius degree for 1 hour. It is shown that the polaron-induced H- $WO_{3-x}$  is selective for the fluorine species in gas phase  $XeF_2$  and HF since H- $WO_{3-x}$  did not react with  $H_2O$ .

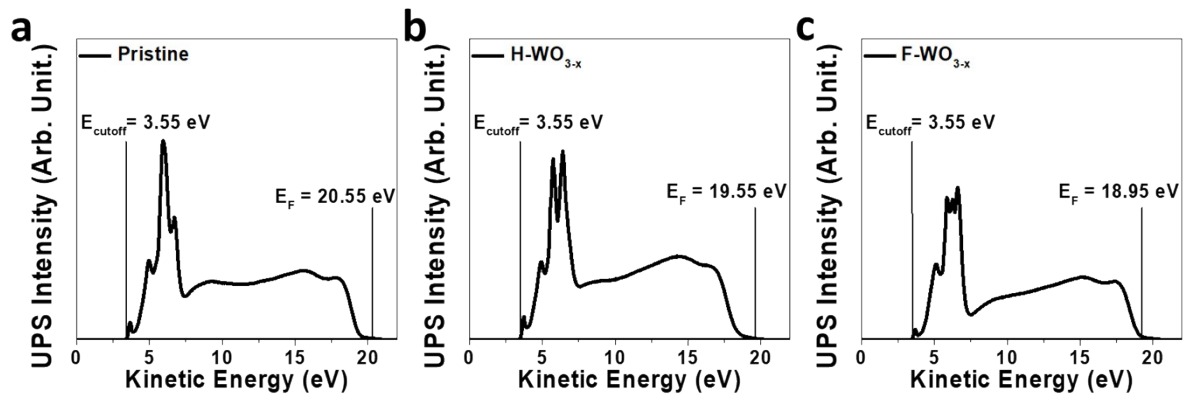

Figure S3. UPS spectra of a) pristine, b) H-WO<sub>3-x</sub> and c) F-WO<sub>3-x</sub>, respectively.
